1 **Association Between The Posterior Part Of The Circle Of**  
2 **Willis And Vertebral Artery Hypoplasia**

3

4 Virginija Gaigalaite\*, Jurate Dementaviciene\*\*, Augenijus Vilimas\*\*, Danute  
5 Kalibatiene\*\*

6 Faculty of Medicine, Vilnius University, Vilnius, Lithuania

7 Currentl address: Faculty of Medicine, Vilnius University, M. K. Ciurlionio g. 21, LT-03101 Vilnius,  
8 Lithuania

9

10 The corresponding author: Virginija Gaigalaite, [virginija.gaigalaite@mf.vu.lt](mailto:virginija.gaigalaite@mf.vu.lt)

11

12 The authors' contribution

13 \* - data collection, study design, interpretation of data, statistical analysis, drafting of the  
14 manuscript. \*\* - study design, data collection and interpretation. All the authors have read  
15 and approved the final manuscript.

16

17

18

19

20 **Abstract**

21 *Background.* It is not clear whether the configuration of the posterior part of the circle of  
22 Willis (CW) depends on the proximal part of the vertebrobasilar system. Our aim is to  
23 evaluate the posterior part of CW in association with different size of vertebral arteries (VA)  
24 in subjects free from stroke and TIA.

25 *Materials and methods.* The present study was based on a sample of 923 subjects free from  
26 stroke and TIA who were examined from 2013 through 2018. All the participants underwent  
27 MRA examination. The duplex ultrasonographic examination of the extracranial arteries  
28 (vertebral and carotid) was performed. VA was defined as hypoplastic (VAH) when VA  
29 diameter in the entire course was less than 2.5 mm. We classified the posterior  
30 communicating arteries (PCoA) as presence PCoA, absence/hypoplastic PCoA and fetal CW  
31 (FCW). The comparison of the posterior part of CW was made in subjects with normal VA  
32 and VAH of a different degree (communicating with basilar artery (VAH-BA) and not  
33 communicating with the basilar artery and terminating in PICA, neck or aplasia (VAH-  
34 PICA)).

35 *Results.* FCW was found in 15.9% of subjects, bilaterally – in 2.3 %. The coexisting VAH  
36 was more common in subjects with FCW rather than in those with adult CW (respectively,  
37 28.6% and 13.4%,  $p<0.001$ ). Aplasia of A1 of the anterior cerebral artery, i.e. blood flow  
38 redistribution in the anterior part of anterior circulation in the majority of cases (in 6 of 7  
39 cases) was found ipsilaterally to FCW. FCW was recorded in 50% of the subjects with VA -  
40 PICA in comparison with 13.5% of those with normal VA and 22.8% with VAH - BA,  
41  $p<0.005$ . On the contrary, absence/hypoplasia of both PCoA was mostly found in the group  
42 with normal VA in comparison with VAH-BA and VAH-PICA (accordingly, 50.7%, 38.6%  
43 and 12.5%,  $p<0.01$ ).

44 *Conclusion.* Individuals with VAH have a different pattern of the posterior part of CW in  
45 comparison with those with normal VA. With the increasing degree of VAH, the proportion  
46 of FCW increases, while the proportion of absence/hypoplastic of both PCoA decreases.

47 **Key words.** Circle of Willis . Fetal variant. Hypoplasia. Vertebrobasilar system. Vertebral  
48 artery.

49

## 50 **Introduction**

51

52 The Circle of Willis (CW) is a major intracranial collateral circulation that has an important  
53 role in ischemic events. The most common configuration of the posterior part of CW is  
54 described as 'adult configuration'. In these cases, the posterior cerebral artery (PCA) is a  
55 terminal branch of the vertebrobasilar system. The diameter of the precommunicating part  
56 (P1) of PCA is larger than the diameter of the posterior communicating artery (PCoA)  
57 connecting the vertebrobasilar and carotid systems. The presence of PCoA enables to  
58 redistribute the blood flow in both directions through PCoA in cases of diminished blood  
59 supply in the internal carotid artery (ICA) or vice versa in the vertebrobasilar system. In the  
60 minority of cases the configuration of the posterior part of CW is the so called fetal-type of  
61 the posterior circle of Willis (FCW). FCW is a morphological variant of the cerebrovascular  
62 anatomy in which PCA arises directly from the terminal ICA, with or without an intact P1  
63 segment connecting PCA to the basilar artery. In this variant, the larger brain area is  
64 dependent on ICA and could be more prone to develop large ischemic strokes in cases of  
65 carotid artery stenosis or occlusion. As described by many authors [1], in these cases the  
66 collateral circulation between the anterior and posterior circulation through secondary  
67 collaterals, i.e. leptomeningeal vessels cannot develop since both, the middle cerebral artery  
68 and PCA are connected to the same internal carotid system.

69 Insufficient attention has been given to the FCW coexistence with other vascular congenital  
70 variants and its influence on both cerebral circulation and neurological symptomatic. It was  
71 described [2] that the coexistence of FCW, basilar artery (BA) hypoplasia and vertebral artery  
72 hypoplasia (VAH) was more common in patients with cerebral ischemia, i.e. this arterial  
73 variant may increase TIA/stroke risk. According to [3], individuals with FCW have an 18%  
74 reduction in BA diameter. It is not clear if the configuration of the posterior part of CW  
75 depends on the proximal part of the vertebrobasilar system, more exactly, on the vertebral  
76 artery (VA) diameter and in cases of a small diameter vertebrobasilar system, which  
77 configuration of posterior collateral circulation is more beneficial.

78 Our aim is to evaluate the posterior part of CW in association with different sizes of VA  
79 (normal diameter, VAH of different degree (communicating with the basilar artery (VAH-  
80 BA) and not communicating with the basilar artery and terminating in PICA, neck or aplasia  
81 (VAH-PICA)) in subjects free from stroke and TIA.

82

## 83 **Material and methods**

84 The present study was based on a sample of 923 subjects without cerebrovascular disease  
85 (TIA or stroke) history before and at the time of the study enrollment. All of them were  
86 examined by magnetic resonance imaging (MRI) and magnetic resonance angiography  
87 (MRA) in the Republican Vilnius University Hospital from 2013 through 2018.

88 The inclusion criteria were as follows: (1) no history of transient ischemic attack, ischemic or  
89 hemorrhagic stroke; (2) no disabling neurological deficits on examination; (3) extracranial or  
90 intracranial vessels without significant stenosis (>50%) or occlusion; (4) the study excluded  
91 the patients who did not undergo MRI or MRA investigation, their intracranial vessels were  
92 not visualised or they refused to participate in the study.

93 *Imaging studies.*

94 All the participants underwent MRA examination using 1.5 Tesla MRI (GE Optima MR450w  
95 1.5T MRI System) for the brain and CW evaluation.

96 The following sequences were obtained: 3D T1 weighted, T2 FLAIR, T2 weighted, diffusion  
97 weighted imaging (DWI, b-0, b-1000), SWAN (Susceptibility weighted Angiography), 3D  
98 Time of Flight MR angiography (3D-TOF-MRA). CW anatomy of each individual was  
99 evaluated using both 3DTOF MRA MIP reconstructions and source images.

100 The duplex ultrasonographic examination of extracranial arteries (vertebral and carotid) was  
101 performed by using the 7.5 MHz linear array transducer of Aloka Prosound F 75 ultrasound  
102 system. The diameter of VA in our previous study was measured similarly [4].

103 *Image analysis.*

104 MRA were reviewed by two independent neuroradiologists. If they had disagreements  
105 regarding the configuration of the circle of Willis, they discussed it until a consensus was  
106 reached.

107 The classification of CW and VA was carried out as follows:

- 108 1. When interpreting MRA, the presence or absence of PCCoA and P1 segment of PCA  
109 was assessed. P1 segment and the posterior communicating artery (PCoA) were  
110 scored as normal (diameter  $\geq 0.8$  mm), hypoplastic (diameter  $< 0.8$  mm in MRA),  
111 absent or non-visualised. The threshold of 0.8 mm in MRA was chosen in order to be  
112 consistent with other studies reported in literature [5].
- 113 2. The posterior part of the circle of Willis was defined as complete in cases of presence  
114 of both PCoA and P1 segment of PCA with diameter  $\geq 0.8$  mm. All other variants  
115 were defined as the incomplete posterior part of CW.

- 116 3. We defined the circle of Willis as fetal if PCA arises from the internal carotid artery,  
117 independent on the presence or absence of the atretic P1 segment. All other  
118 individuals were named as having” adult” configuration of CW. The subjects with  
119 adult and rarely found transitional CW configuration were included in this group. In  
120 cases of adult configuration, P1 segment of PCA had a diameter larger than PCoA  
121 while in transitional configuration, P1 segment and PCoA have close diameters.
- 122 4. The posterior part of CW was documented as presence of PCoA, absence/hypoplastic  
123 PCoA and FCW. The subjects with hypoplastic PCoA were included in the same  
124 group as those with absence of PComA since both groups have minimal or no  
125 possibilities to compensate the reduced posterior circulation from carotid arteries  
126 through PCoA in comparison with the individuals with presence of normal PCoA.
- 127 5. The absence of A1 segment of the anterior cerebral artery (ACA) was documented.  
128 In these cases both A2 segments are supplied by the existing A1 from the contralateral  
129 ACA.
- 130 6. VAH was established according to MRA (V4 segment) and duplex scanning (V1-V3  
131 segment). We defined VA as hypoplastic when VA diameter in the entire course was  
132 less than 2.5 mm. We also studied the group named “VAH-PICA” with VA aplasia or  
133 hypoplastic VA not communicating with BA and terminating in PICA or the neck ,  
134 i.e. subjects with the possibility of the greatest reduced blood flow through VA.

135 We present a pattern of the posterior part of CW found in our individuals. We have  
136 estimated what concomitant vascular variants of the vertebrobasilar system are more  
137 common in FCW in comparison with the adult CW. Also, we have estimated if FCW  
138 influence blood flow redistribution in the anterior part of anterior circulation, i.e. if both  
139 A2 segments are supplied by the existing A1 from the contralateral or ipsilateral sides of  
140 ACA.

141 We assessed if the posterior part of CW differs in subjects with normal VA, VAH  
142 communicating with BA and VAH not communicating with BA or VA aplasia.

143

#### 144 *Statistics*

145 The *Chi* square independence ( $\chi^2$ ) test was applied in carrying out the comparison between  
146 the categorical variables, while Fisher's exact test was used in the case of a small sample size.  
147 Continuous variables meeting the assumptions of normality were analysed using t-tests for  
148 independent groups. The chosen significance level was  $\alpha=0.05$ .

149 **Ethics.** This study was approved by the Ethics Committee for the Vilnius region (No.  
150 158200-15-767-281).

151

## 152 **Results**

153

154 *Posterior part of CW.* The characteristics of the posterior part of CW are presented in Table  
155 1. FCW was found in 15.9 % of subjects free of stroke and TIA. Side-related differences in  
156 the posterior part of CW observed in both types of CW did not reach a statistically significant  
157 difference. In 47.9% of individuals both PCoA were absent or hypoplastic. 2.3 % of the  
158 subjects had both-sided FCW.

159 Table 1. The characteristics of the posterior part of the circle of Willis (n=923)

| Type of posterior part of CW | N   | Proportion (%) |
|------------------------------|-----|----------------|
| Adult type                   | 776 | 84.1           |
| • Absence of both PCoA       | 442 | 47.9           |

|                                       |     |      |
|---------------------------------------|-----|------|
| • Absence of one PCoA                 | 191 | 20.7 |
| ○ Absence of left PCoA                | 112 | 12.1 |
| ○ Absence of right PCoA               | 79  | 8.6  |
| • Both PCoA                           | 143 | 15.5 |
| Fetal type                            | 147 | 15.9 |
| Side of fetal circle of Willis        |     |      |
| • Left-sided                          | 58  | 6.3  |
| • Right-sided                         | 68  | 7.4  |
| • Both-sided                          | 21  | 2.3  |
| Contralateral PCoA                    |     |      |
| • Absence/hypoplasia                  | 81  | 8.8  |
| • Normal                              | 45  | 4.9  |
| • Fetal circle of Willis (both-sided) | 21  | 2.3  |

160

161 *Demographic characteristics and coexisting arterial variants in adult CW and FCW (Table*  
 162 *2). The proportion of men and women did not differ in both configurations of CW. The*  
 163 *coexisting VAH was more common in subjects with FCW than in subjects with adult CW*  
 164 *(correspondingly, 28.6% and 13.4%,  $p < 0.001$ ). Aplasia of A1 was rare in both groups,*  
 165 *although aplasia of A1 was more common in the group with FCW compared to those with*  
 166 *adult CW. Moreover, in the majority of the subjects with FCW (in 6 of 7 cases), A1 aplasia*  
 167 *was found ipsilaterally to FCW, the carotid artery supplies blood to PCA and MCA, while*  
 168 *ACA is receiving blood from the contralateral carotid artery.*

169 Table 2. The comparison of coexisting characteristics in FCW and adult CW



|                                                                                                                                                 | Fetal circle of Willis<br>N=147                                                | Adult circle of Willis<br>N=776 | p-value |
|-------------------------------------------------------------------------------------------------------------------------------------------------|--------------------------------------------------------------------------------|---------------------------------|---------|
| <i>Demographics:</i>                                                                                                                            |                                                                                |                                 |         |
| Men                                                                                                                                             | 79 (53.7%)                                                                     | 448 (57.7%)                     | NS*     |
| Age                                                                                                                                             | 46.4±1.4                                                                       | 48.1±0.4                        | NS      |
| <i>Vertebrobasilar system</i>                                                                                                                   |                                                                                |                                 |         |
| VAH                                                                                                                                             | 42 (28.6%)                                                                     | 104 ( 13.4%)                    | <0.001  |
| VAH terminating<br>in PICA/aplasia                                                                                                              | 16 (10.9%)                                                                     | 16 ( 2.1%)                      | <0.001  |
| BA hypoplasia<br>/aplasia                                                                                                                       | 2 (1.4%)                                                                       | 5 (0.64%)                       | NS      |
| Fenestretion of BA                                                                                                                              | 1 (0.7%)                                                                       | 3 (0.4%)                        | NS      |
| <i>Anterior part: Aplasia<br/>of A1 (ACA artery)<br/>segment and both A2<br/>segments are supplied<br/>from one side by the<br/>existing A1</i> | 7 (4.8%)<br><br>Ipsilateral side: 6 (4.1%)<br>Contralateral side: 1<br>(0.7 %) | 13 (1.7%)                       | 0.018   |

170

171 \*NS-p>0.05

172 *Association between VAH and the pattern of the posterior part of CW.* The association  
 173 between VAH and the variants of the posterior part of CW is presented in Table 3. The  
 174 pattern of the posterior part of CW in subjects with VAH differs from those with normal VA.

175 FCW was more frequent in individuals with VAH than in those with normal VA  
176 (accordingly, 28.8 % vs. 13.5%,  $p<0.001$ ), while the absence/hypoplasia of both PCoA was  
177 more common in subjects with normal VA in comparison to those with VAH (accordingly,  
178 50.7% and 32.9% ,  $p<0.001$ ).

179

180 Table 3. The comparison of the posterior part of CW in patients with VAH and normal VA.

|                        | Normal (n=777) | VAH (n=146) | P-value  |
|------------------------|----------------|-------------|----------|
| Adult type:            |                |             |          |
| Absence of both PCoA   | 394 (50.7%)    | 48 (32.9%)  | $<0.001$ |
| Absence of one PCoA    | 164 (21.1%)    | 27 (18.5%)  | NS*      |
| Presence of both PCoA  | 114 (14.7%)    | 29 (19.9%)  | NS       |
| Fetal circle of Willis |                |             |          |
| Unilateral             | 105 (13.5%)    | 42 (28.8%)  | 0.001    |
| Bilateral              | 96 (12.4%)     | 30 (20.5%)  | 0.008    |
|                        | 9 (1.2%)       | 12 (8.2%)   | $<0.001$ |

181

182 \*NS- $p>0.05$

183

184 *Difference of the posterior part of CW in subjects with VAH not communicating with the*  
185 *basilar artery and those with VAH communicating with the basilar artery.* The above  
186 mentioned regularity was even more striking in the least developed hypoplastic VA that do  
187 not communicate with the basilar artery (Table 4). Half of the patients with VAH - PICA had  
188 FCW compared to 13.5% of those with normal VA diameter and to 22.8% of individuals with  
189 VAH that communicates with the basilar artery,  $p<0.005$ . Moreover, the proportion of

190 bilateral FCW was largest in the subjects with VAH-PICA. On the contrary, the absence of  
 191 both PCoA was most frequent in the group with normal VA and rare in VAH-PICA group  
 192 (accordingly, 50.7% and 12.5%,  $p < 0.001$ ).

193 Table 4. Comparison of the posterior part of CW in patients with a different degree of VAH.

194

|                        | Normal (n=777) | VAH-BA (n=114) | VAH-PICA (n= 32) | p-value |
|------------------------|----------------|----------------|------------------|---------|
| Adult type:            |                |                |                  |         |
| Absence of both PCoA   | 394 (50.7%)    | 44 (38.6%)     | 4 (12.5%)        | 0.001   |
| Absence of one PCoA    | 164 (21.1%)    | 22 (19.3%)     | 5 (15.6%)        | NS      |
| Presence of both PCoA  | 114 (14.7%)    | 22 (19.3%)     | 7 (21.9%)        | NS      |
| Fetal circle of Willis | 105 (13.5%)    | 26 (22.8%)     | 16 (50%)         | 0.001   |
| Unilateral             | 96 (12.4%)     | 20 (17.5%)     | 10 (31.3%)       | 0.004   |
| Bilateral              | 9 (1.2%)       | 6 (5.3%)       | 6 (18.8%)        | 0.001   |

195

196 *The sides of VAH and FCW.* VAH and FCW were more frequently observed on the same  
 197 side: VAH was observed ipsilaterally to FCW in 76% of cases, VAH - PICA - ipsilaterally to  
 198 FCW in 82.4% of cases.

199

## 200 Discussion

201

202 FCW was found in 15.9% of individuals, bilaterally - in 2.3% of cases. According to other  
203 authors, the proportion of FCW ranges from 11 to 32% [1], [6], [7], [8], [9]. VAH was  
204 observed in 12.5 % of subjects. According to the data presented by other authors, depending  
205 on the VAH definition, the method of examination and the category of population, this  
206 proportion ranges from 1.9% to 25% [10]. Therefore, the population under our investigation  
207 was a typical population.

208 FCW was more frequently observed in subjects with VAH, i.e. with an insufficiently  
209 developed proximal part of the vertebrobasilar system, compared to those with normal VA  
210 diameter. Among individuals with a very small VA terminating in PICA/neck/aplasia,  
211 compared to those subjects whose VA is wider and forms the basilar artery, the proportion  
212 of FCW was larger. Moreover, FCW was more common in ipsilateral to VAH side rather  
213 than contralateral.

214 According to [3], BA diameter is inversely associated with FCW. Otherwise, FCW was more  
215 common in individuals with an insufficiently developed distal part of the vertebrobasilar  
216 system which can lead to inadequate posterior circulation, rather than in those with the  
217 normal basilar artery. The influence of an insufficiently developed proximal part of the  
218 vertebrobasilar system, including VAH or aplasia on the posterior circulation insufficiency  
219 and as a consequence the demand to compensate the possible inadequate blood supply to the  
220 brain is under discussion. Although, many authors estimate VAH as an independent predictor  
221 of stroke or TIA [10]. The hypothesis that VAH can lead to the posterior circulation  
222 insufficiency is also supported by our results that with the decreasing VA diameter, the risk  
223 of stroke/TIA increases [4]. Moreover, VAH can lead to a relative regional hypoperfusion in  
224 the PICA territory [11]. As described in a study [1], during the embryological development  
225 the anterior circulation supplies the occipital region, the brain stem and the cerebellum via

226 multiple anastomoses because the posterior circulation is not yet well developed. After the  
227 development of VA and sufficient posterior circulation, these anastomoses regress. FCW as a  
228 result of failed regression that may be associated with insufficient blood supply via the  
229 insufficiently developed vertebrobasilar system, including hypoplastic. In these cases the  
230 carotid artery may particularly recall the role of the vertebrobasilar system by supplying  
231 blood to the posterior fossa as in the embryological development. The greater proportion of  
232 FCW in subjects with more severe VAH whose blood flow through VA is reduced to a  
233 greater degree supports the hypothesis that with the decreasing blood supply from VA to the  
234 brain, the possible inadequate perfusion in posterior circulation is more frequently  
235 compensated through FCW from anterior circulation, ICA. In case of small diameter VA,  
236 compared to normal diameter VA, FCW may provide better blood supply to the brain and  
237 prevent from cerebral ischemia.

238 In summary, the pattern of the posterior part of CW in stroke/TIA-free subjects with VAH  
239 and normal VA was different. The proportion of absence/hypoplasia of both PCoA, i.e. the  
240 absence /hypoplasia of primary collaterals was larger in subjects with normal proximal  
241 circulation, i.e. normal VA diameter compared to those with insufficiently developed  
242 proximal part of the vertebrobasilar system, VAH. And vice versa, the proportion of FCW  
243 was larger in those with VAH compared to those with normal VA diameter. The proportion  
244 of subjects with a complete posterior part was larger in those with VAH although the  
245 difference did not reach a statistically significant difference. These results support the  
246 hypothesis that in cases of small vertebral arteries the collateral circulation through PCoA or  
247 FCW may be important for prevention of stroke/TIA in the posterior circulation.  
248 Future investigations are needed in order to assess whether in cases of VAH the configuration  
249 of the posterior part of CW can prevent or increase the stroke/TIA risk. The study [1]  
250 revealed that the coexistence of the basilar artery hypoplasia, VAH and the fetal CW were

251 more common in stroke patients. However, in the above mentioned study, the role of FCW is  
252 not clear. Is FCW an independent stroke predictor, or is FCW not able to compensate the  
253 reduced blood flow in cases of coexistence of small proximal and distal parts of the  
254 vertebrobasilar system? Future investigations are needed on the associations between a small  
255 vertebrobasilar system, CW configuration and neurological symptoms such as vertigo.  
256 Patients with stroke/TIA were excluded from our study, however, suggestions can be made  
257 for further studies to compare how CW differs in vertigo patients and healthy subjects.  
258 In cases of FCW, the territory supplied with blood by the carotid artery increases up to three  
259 arteries (ACA, middle cerebral artery (MCA) and PCA). A1 aplasia in most cases is found  
260 ipsilateral to FCW and may be associated with the need to redistribute the blood flow in the  
261 anterior circulation and to reduce the territory of blood supply from the carotid artery from  
262 three arteries territory (ACA, MCA, PCA) to two arteries territory (MCA, PCA, while both  
263 ACA are supplying from the contralateral carotid artery.

264

## 265 **Conclusions**

266 Individuals with VAH have a different pattern of the posterior part of CW in comparison  
267 with those with normal VA diameter. With the increasing degree of VAH, the proportion of  
268 FCW increases while the proportion of absence/hypoplasia of both PCoA decreases.

269

## 270 **Acknowledgements**

271 We thank Leonora Norviliene for providing assistance in the revision and translation of the  
272 manuscript.

273

274

## 275 **References**

276

- 277 1. van Raamt AF, Mali WP, van Laar PJ, van der Graaf Y. The fetal variant of the circle  
278 of Willis and its influence on the cerebral collateral circulation. *Cerebrovasc Dis.*  
279 2006; 22: 217–224.
- 280 2. Lochner P, Gsolaszewski S, Caleri F, Ladurner G, Tezzon F, Zuccoli G, Nardone  
281 R. Posterior circulation ischemia in patients with fetal-type circle of Willis and  
282 hypoplastic vertebrobasilar system. *Neurological sciences.* 2011; 32: 1143-1146
- 283 3. Del Brutto OH, Mera RM, Costa AF, Del Brutto VJ . Basilar Artery Diameter Is  
284 Inversely Associated with Fetal Type Circle of Willis. *Eur Neurol.* 2017; 78(3-4):  
285 217-220.
- 286 4. Gaigalaite V, Vilimas A, Ozeraitiene V et al., Association between vertebral artery  
287 hypoplasia and posterior circulation stroke. *BMC Neurology.* 2016; 16:118.  
288 Available from: [https://bmneurol.biomedcentral.com/track/pdf/10.1186/s12883-016-](https://bmneurol.biomedcentral.com/track/pdf/10.1186/s12883-016-0644-x)  
289 [0644-x](https://bmneurol.biomedcentral.com/track/pdf/10.1186/s12883-016-0644-x)
- 290 5. Krabbe-Hartkamp MJ, van der Grond J, de Leeuw FE, de Groot JC, Algra A, et al.  
291 Circle of Willis: morphologic variation on three-dimensional time-of-flight MR  
292 angiograms. *Radiology* 207: 1998; 103–111.
- 293 6. Hakim A, Gralla J, Rozeik CH, Mordasini P, Leidolt L, Piechowiak E. Anomalies  
294 and Normal Variants of the Cerebral Arterial Supply: A Comprehensive Pictorial  
295 Review with a Proposed Workflow for Classification and Significance. *J*  
296 *Neuroimaging* 2017; 00:1-22.
- 297 7. Shaban A, Albright KC, Boehme AK, et al. Circle of Willis variants: Fetal PCA.  
298 *Stroke Res Treat.* 2013; 2013:1-7.

- 299 8. Abdelaziz Maaly M, Abdelazim Ismail A. Three dimensional magnetic resonance  
300 angiography of the circle of Willis: Anatomical variations in general Egyptian  
301 population. The Egyptian Journal of Radiology and Nuclear Medicine. 2011; 42, 405–  
302 412.
- 303 9. Qi Li , Jialun Li , Fajin Lv , Kewei Li , Tianyou Luo , Peng Xie. A multidetector CT  
304 angiography study of variations in the circle of Willis in a Chinese population  
305 Journal of Clinical Neuroscience. 2011; 18: 379–383.  
306
- 307 10. Katsanos AH, Kosmidou M, Giannopoulos S. Is Vertebral Artery Hypoplasia a  
308 Predisposing Factor for Posterior Circulation Cerebral Ischemic Events? A  
309 Comprehensive Review. Eur Neurol. 2013; 70:78–83.
- 310 11. Thierfelder KM, Baumann AB, Sommer WH. Vertebral Artery Hypoplasia Frequency  
311 and Effect on Cerebellar Blood Flow Characteristics. Stroke. 2014; 45:1363-1368.  
312
